# Supplementary material for: Bicuspid aortic valve formation: Nos3 mutation leads to abnormal lineage patterning of neural crest cells and the second heart field
Source: Oxford University Press journal article supplement (doi:10.1242/dmm.034637), 2018-09-20
Supplement: dmm034637supp.pdf [file dmm034637supp.pdf]

## Supplemental Material

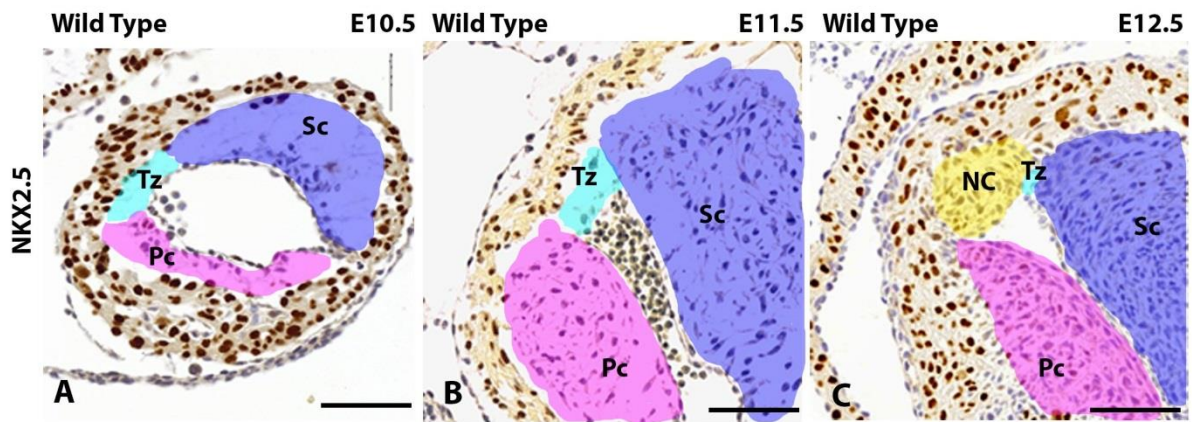

Figure S1.

### ***Endocardial cushion development in wild type embryos***

A: At E10,5 endocardial cells have migrated into the septal cushion (Sc) (blue) and parietal cushion (Pc) (purple). These cushions remained connected by a transitional zone (Tz) (cyan), a thin region of cardiac jelly sparsely populated by cells. B: The Pc and Sc enlarged at E11.5 whereas the transitional zone remained sparsely populated. C: At E12.5 the transitional zone was positioned at the site of the commissure between the left coronary leaflet (LC) and non-coronary leaflet (NC). The NC (yellow) was separated from the Pc. Myocardial cells were NKX2.5 positive (brown) . Scale bar is 50µm.

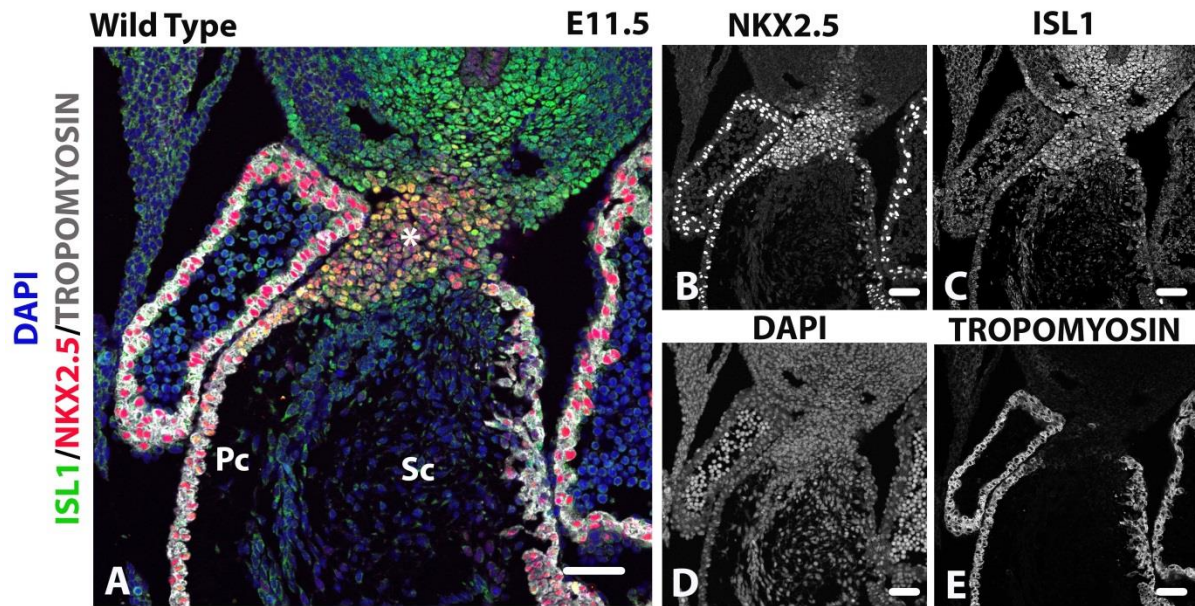

Figure S2.

***NKX2.5<sup>+</sup>/TROPOMYOSIN<sup>+</sup> cells represents ISL1<sup>+</sup> second heart field cells contributing to the outflow tract.***

A-E: Immuno-fluorescent images showing co-expression of NKX2.5 and ISL1 in second heart field cells contributing to the formation of the outflow tract in E11.5 wild type embryos. Colour scheme: Anti-NKX2.5 (red), Anti-ISL1 (green), Anti-TROPOMYOSIN (grey), DAPI was used as a nuclear staining (blue). Scale bar: 50µm.

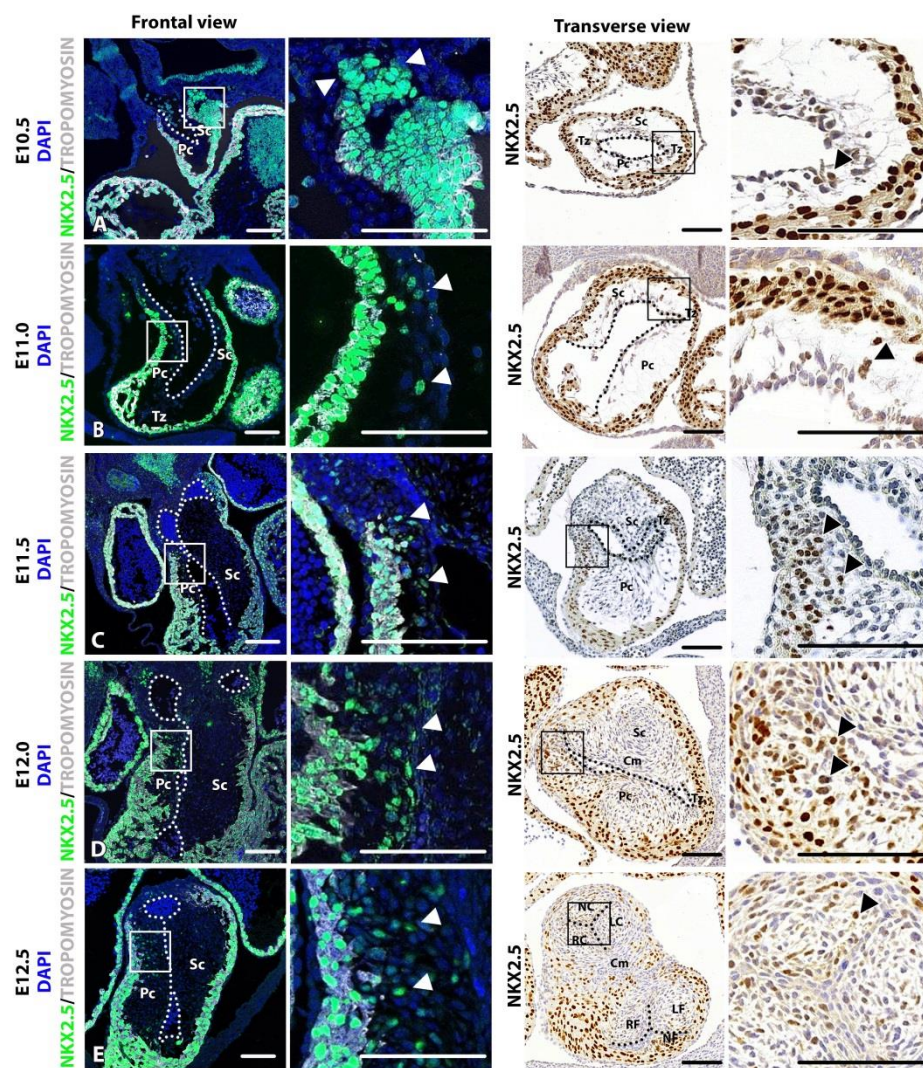

Figure S3.

***Direct NKX2.5<sup>+</sup>/TROPOMYOSIN<sup>-</sup> second heart field cells contribution to the aortic valve***

A-E: NKX2.5<sup>+</sup>/TROPOMYOSIN<sup>-</sup> second heart field cells migrate into the cushions during development and contribute directly to the formation of the aortic leaflets. Colour scheme immunofluorescent images: Anti-NKX2.5 (green), Anti-TROPOMYOSIN (grey), Nuclei were stained with DAPI (blue). Colour scheme immunohistological images: Anti-NKX2.5 (brown), nuclei are counterstained using hematoxine eosine (HE). Scale bar: 50µm.

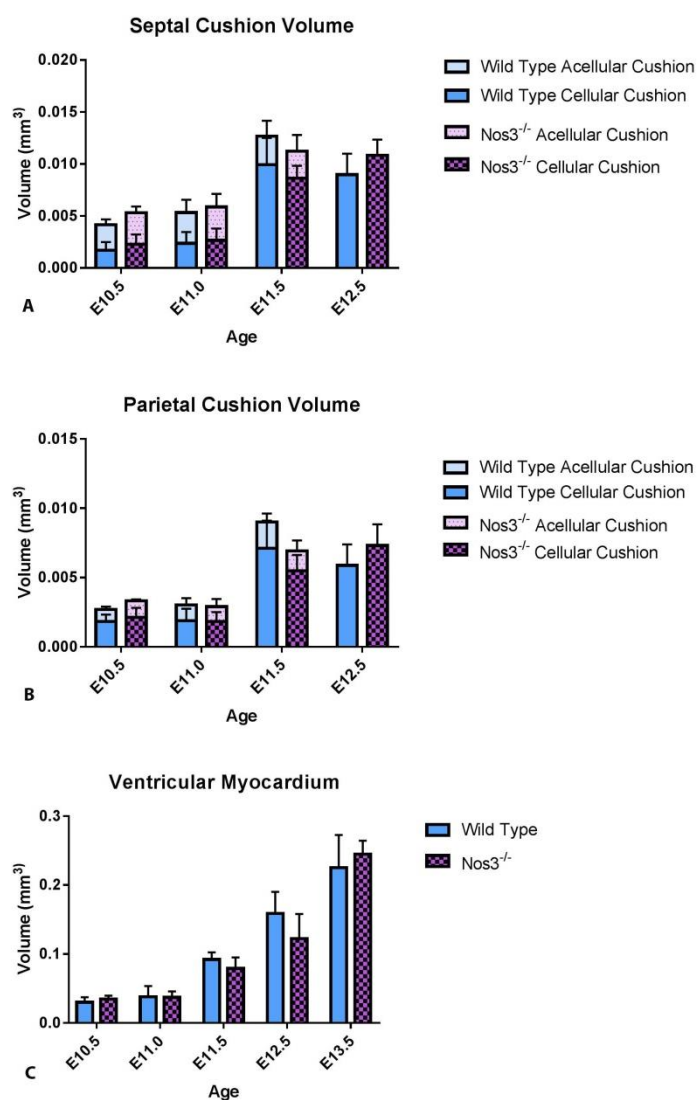

Figure S4.

***Cushion volume is not affected in  $Nos3^{-/-}$  embryos during stages E10.5 to E12.5 of embryonic development***

A,B: Total cushion volume analysis indicated no differences ( $p > 0.05$ ) in total volume of septal (A) and parietal (B) cushions between wild type and  $Nos3^{-/-}$  embryos during development. Close examination also showed no difference in the cellular fractions of the septal and parietal cushions nor the acellular fractions between wild type and  $Nos3^{-/-}$  embryos at stages E10.5 to E12.5. C: Myocardial volume analysis established that  $Nos3^{-/-}$  embryos have an equal heart size compared to wild type embryos. Data are mean  $\pm$  s.d. Analysis was performed using two tailed student T test.

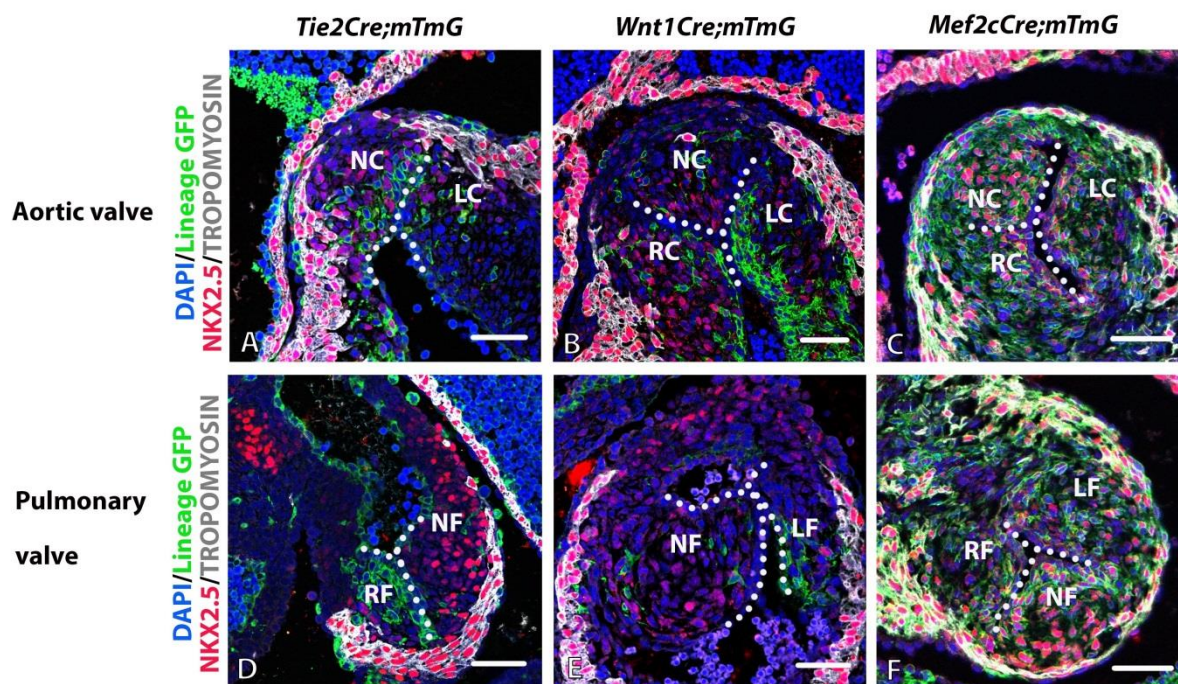

Figure S5.

**Aortic leaflets have unique cell lineage distributions**

A-F: Detection of NKX2.5 positive cells negative for TROPOMYOSIN indicated direct contribution of second heart field cells to the non-coronary aortic and non-facing pulmonary leaflet in wild type embryos at E12.5. NKX2.5<sup>+</sup>/TROPOMYOSIN<sup>-</sup> cells show no overlap with the *Tie2Cre* endothelial (A,D; green) or *Wnt1Cre* neural crest (B,E; green) lineages but do overlap with *Mef2cCre* second heart field derived cells (C,F; green). Dots indicate endothelial lining(white). Color scheme: TROPOMYOSIN (grey), DAPI (blue), NKX2.5 (red), Lineage-Cre derived GFP (green). Scale bar: 50µm

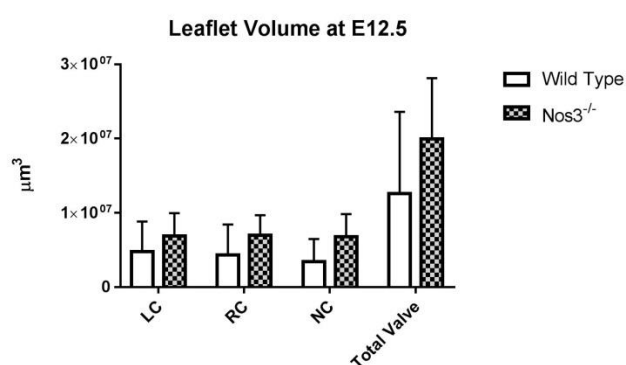

Figure S6.

**Total leaflet volume is not affected in *Nos3*<sup>-/-</sup> embryos.**

Volume analysis of aortic leaflets in the aortic valve shows equal volume in wild type and *Nos3*<sup>-/-</sup> embryos. LC: left coronary leaflet, RC: right coronary leaflet, NC: non-coronary leaflet. Data are mean ± s.d. Analysis was performed using two tailed student T test.

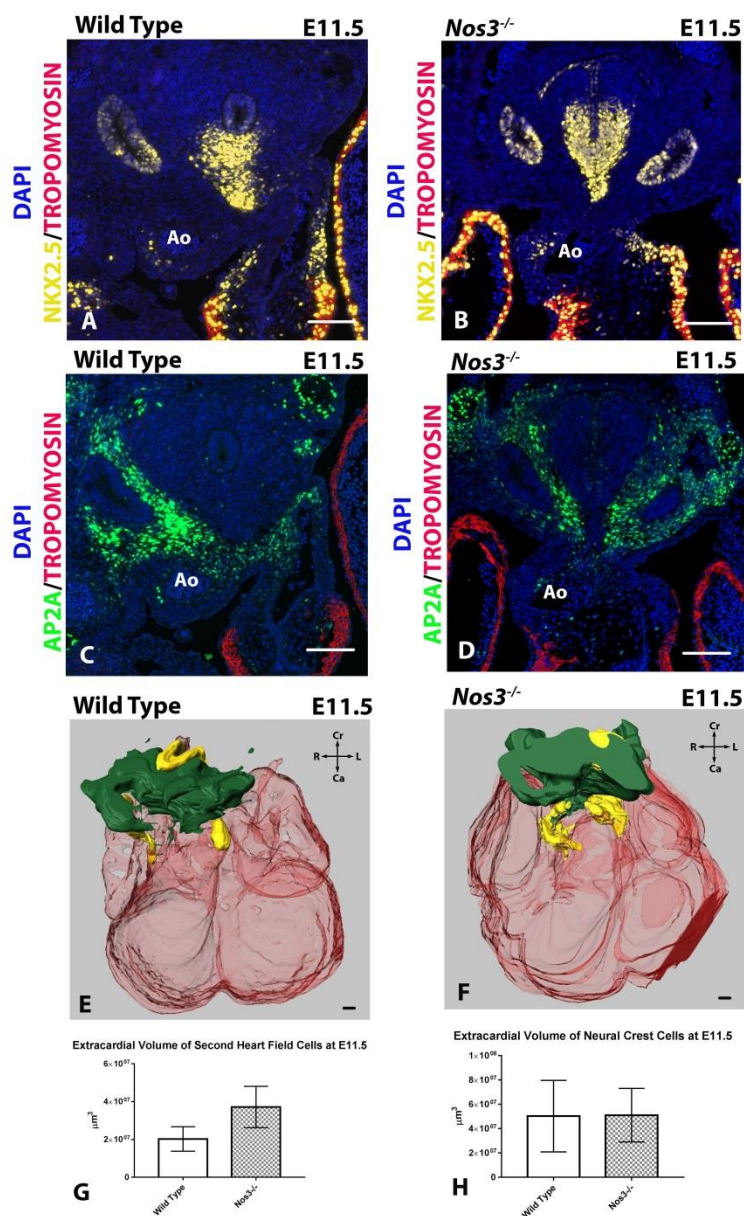

Figure S7.

**Extracardial neural crest and second heart field population are not affected by *Nos3* mutation.**

A:D immuno-fluorescent images of extracardial NKX2.5<sup>+</sup>/TROPOMYOSIN<sup>-</sup> second heart field (SHF) (yellow) and AP2A neural crest cell (green) populations in wild type (A,C) and *Nos3*<sup>-/-</sup> (B,D) embryos at stage E11.5 when migration into the cushions has been initiated. E-F: 3D reconstruction of extracardial neural crest (green) and SHF populations (yellow) show similar localization in both wild type and *Nos3*<sup>-/-</sup> embryos. G-H: Volume analysis of extracardial populations shows no difference ( $P > 0.05$ ) between SHF cells (G) and neural crest cells (H) between wild type and *Nos3*<sup>-/-</sup> at E11.5. Colour scheme: Anti-NKX2.5 (yellow), Anti-AP2A (Green), Anti-TROPOMYOSIN (red), Nuclei were stained with DAPI (blue). Data are mean  $\pm$  s.d. Analysis was performed using two tailed student T test. Scale bars: 50 μm

|                      |                               |
|----------------------|-------------------------------|
| Fwd_Cre              | ATG-GAT-TTC-CGT-CTC-TGG-TG    |
| Rev_Cre              | TTG-CCC-CTG-TTT-CAC-TAT-CC    |
| Nos3_Mut_oIMR8963    | AAT TCG CCA ATG ACA AGA CG    |
| Nos3_WT_oIMR9357     | AGG GGA ACA AGC CCA GTA GT    |
| Nos3_Common_oIMR9358 | CTT GTC CCC TAG GCA CCT CT    |
| mTmG_WT_oIMR9021     | CCG AAA ATC TGT GGG AAG TC    |
| mTmG_Mut_22163       | CGG GCC ATT TAC CGT AAG TTA T |
| mTmG_Common_oIMR9020 | AAG GGA GCT GCA GTG GAG TA    |

Table S1. **Primers used for genotyping**

| Primary Antibodies                           | Manufacturer                | Dilutions |
|----------------------------------------------|-----------------------------|-----------|
| Nkx2.5                                       | Santa Cruz SC-8697          | 1/4000    |
| eGFP                                         | Abcam ab13970               | 1/500     |
| Tropomyosin                                  | Sigma-Aldrich Chemie T9283  | 1/500     |
| PECAM1                                       | Santa Cruz sc-1506-R        | 1/500     |
| AP2 $\alpha$                                 | GeneTex GTX62588            | 1/2000    |
| Secondary Antibodies                         | Manufacturer                | Dilutions |
| Horse Anti-Goat-Biotin                       | Vector labs BA-9500         | 1/200     |
| HRP~Streptavidine - (PO)                     | Agilent P039701             | 1/200     |
| Alexa Fluor488~Goat anti-Chicken IgY (H+L)   | Thermo Scientific A-11039   | 1/200     |
| Alexa Fluor 594~Donkey Anti-Mouse IgG (H+L)  | Life technologies A-21203   | 1/200     |
| Alexa Fluor 555~Donkey Anti-Rabbit IgG (H+L) | Life technologies A-31572   | 1/200     |
| Cy5-Biotin                                   | LifeSpan Biosciences ab6975 | 1/200     |

Table S2.

**Antibodies used in this study**

|              |               |                            | Experimental Evaluation |                            |                    |                            |
|--------------|---------------|----------------------------|-------------------------|----------------------------|--------------------|----------------------------|
|              | Total embryos |                            | Immuno-staining         |                            | 3D Reconstructions |                            |
| Age          | Wild Type     | <i>Nos3</i> <sup>-/-</sup> | Wild Type               | <i>Nos3</i> <sup>-/-</sup> | Wild type          | <i>Nos3</i> <sup>-/-</sup> |
| <b>E10.5</b> | 3             | 4                          | 3                       | 4                          | 2                  | 2                          |
| <b>E11.0</b> | 7             | 6                          | 7                       | 6                          | 1                  | 0                          |
| <b>E11.5</b> | 11            | 11                         | 11                      | 11                         | 5                  | 3                          |
| <b>E12.0</b> | 4             | 2                          | 4                       | 2                          | 1                  | 0                          |
| <b>E12.5</b> | 20            | 16                         | 20                      | 16                         | 4                  | 4                          |
| <b>E13.5</b> | 14            | 11                         | 14                      | 11                         | 2                  | 1                          |
| <b>E14.5</b> | 8             | 8                          | 8                       | 8                          | 2                  | 4                          |
| <b>E15.5</b> | 3             | 8                          | 3                       | 8                          | 0                  | 0                          |
| <b>E16.5</b> | 4             | 12                         | 4                       | 12                         | 2                  | 1                          |

Table S3.

**Number of embryos used in this study**

| Age         | BAV in WT        | BAV in <i>Nos3</i> <sup>-/-</sup> | Other cardiovascular anomalies in WT | Other cardiovascular anomalies in <i>Nos3</i> <sup>-/-</sup> |
|-------------|------------------|-----------------------------------|--------------------------------------|--------------------------------------------------------------|
| E12.5       | 0/20             | 4/16                              | 0/20                                 | 0/16                                                         |
| E13.5       | 0/14             | 0/11                              | 0/14                                 | 0/11                                                         |
| E14.5       | 0/8              | 2/8                               | 0/8                                  | 0/8                                                          |
| E15.5       | 0/3              | 5/8                               | 0/3                                  | 0/8                                                          |
| E16.5       | 0/4              | 4/12                              | 0/4                                  | 0/12                                                         |
| <b>Mean</b> | <b>0/49 (0%)</b> | <b>15/55 (27.27%)</b>             | <b>0/49 (0%)</b>                     | <b>0/55 (0%)</b>                                             |

Table S4.

**Percentage of BAV found in wild type (WT) and *Nos3*<sup>-/-</sup>.**
